# Supplementary material for: Ivy gourd (Coccinia grandis L. Voigt) root suppresses adipocyte differentiation in 3T3-L1 cells
Source: PubMed Central journal article supplement (PMC4064515; doi:10.1186/1476-511x-13-88), 2014-05-28
Supplement: 1476-511X-13-88-S4.pdf [file 1476-511X-13-88-S4.pdf]

(A)

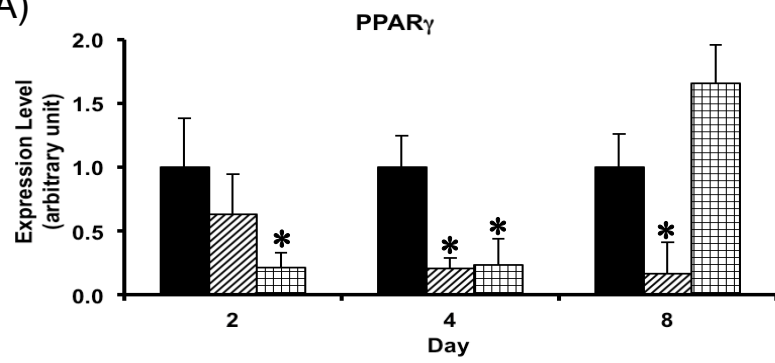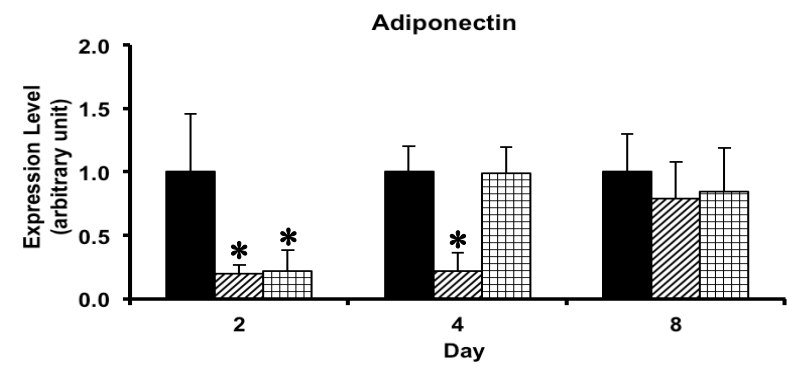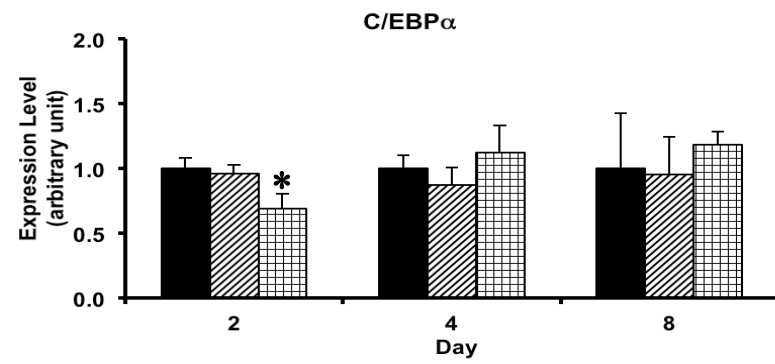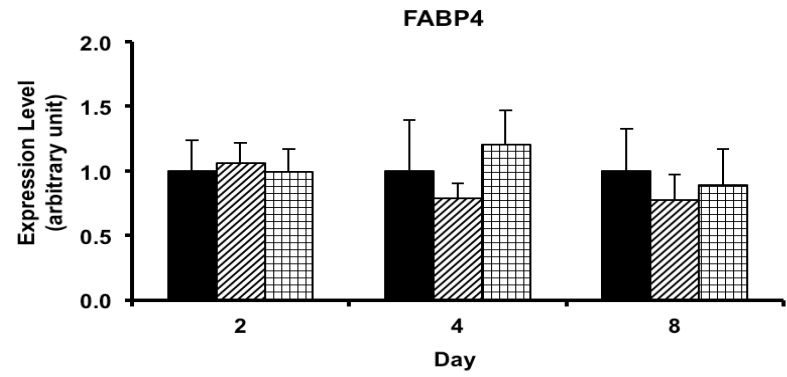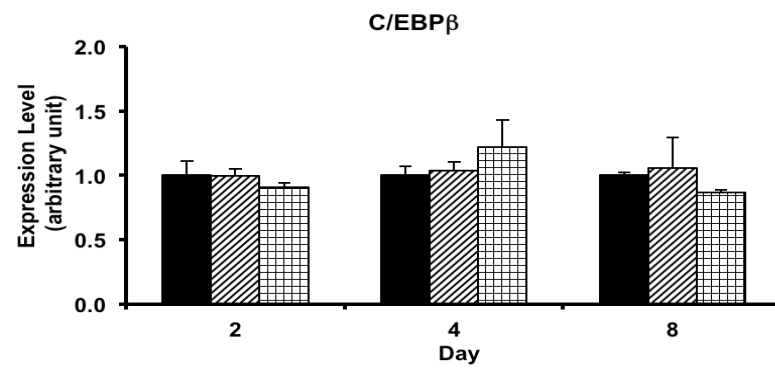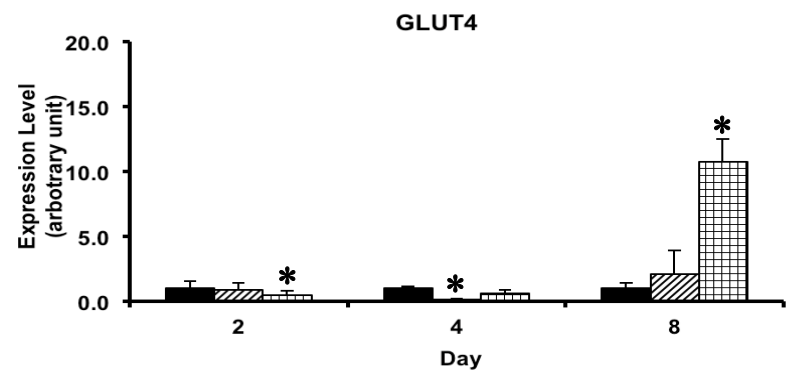

Figure S2

(B)

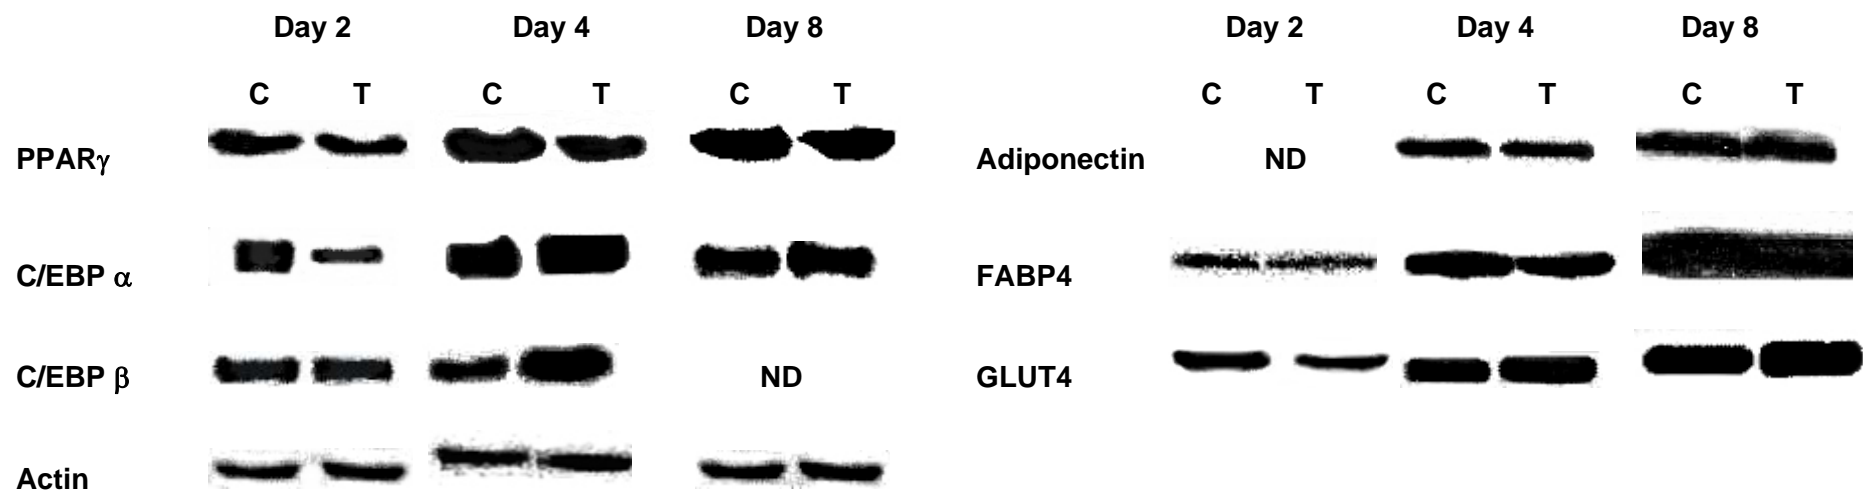

Figure S2 (cont.)
